# Supplementary material for: DPD simulations on morphologies and structures of blank PLGA-b-PEG-b-PLGA polymeric micelles and docetaxel-loaded PLGA-b-PEG-b-PLGA polymeric micelles
Source: Royal Society of Chemistry journal article supplement (doi:10.1039/d2ra00940d), 2022-01-01
Supplement: d2ra00940d1.pdf [file d2ra00940d1.pdf]

ARTICLE

## DPD simulations on morphologies and structures of blank PLGA-*b*-PEG-*b*-PLGA polymeric micelle and Docetaxel-loaded PLGA-*b*-PEG-*b*-PLGA polymeric micelle

Mengyao Wang,<sup>1</sup> Ye Lin,<sup>1</sup> Jianxu Gao,<sup>1</sup> and Dongmei Liu,<sup>\*1</sup>

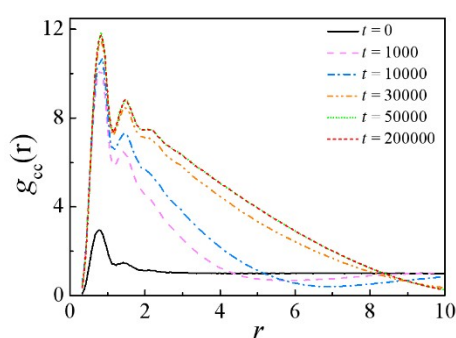

Fig. S1 The radial distribution functions between beads of the blank PLGA<sub>3</sub>-*b*-PEG<sub>7</sub>-*b*-PLGA<sub>3</sub> micelles at different simulation times.

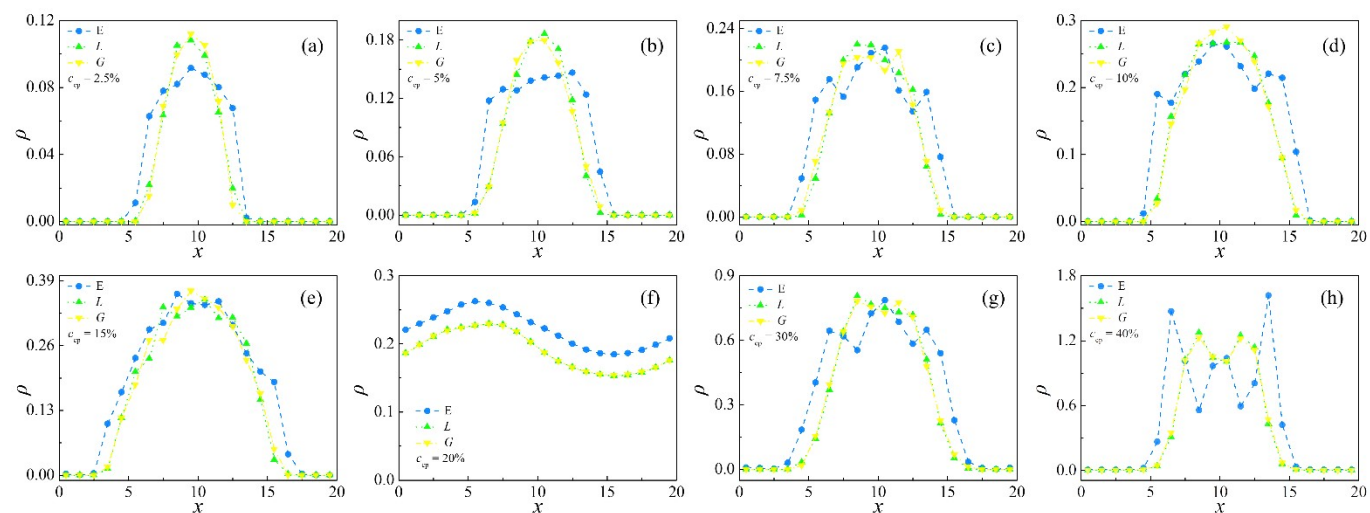

Fig. S2 Density profiles of E, L and G beads of the blank PLGA<sub>3</sub>-*b*-PEG<sub>7</sub>-*b*-PLGA<sub>3</sub> micelles as a function of copolymer concentration.

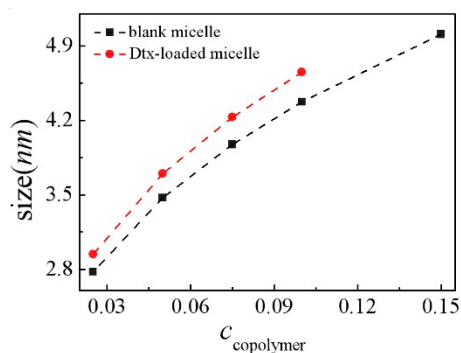

Fig. S3 The size of the blank and Dtx-loaded PLGA<sub>3</sub>-*b*-PEG<sub>7</sub>-*b*-PLGA<sub>3</sub> micelles as a function of the copolymer concentration.

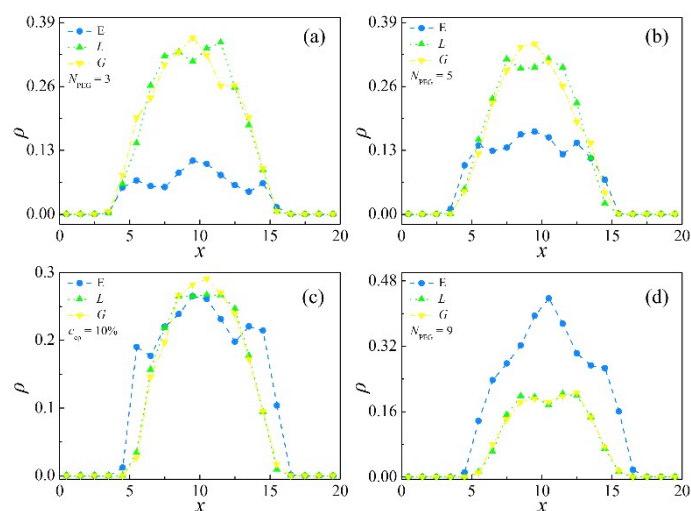

Fig. S4 Density profiles of E, L and G beads of the blank PLGA<sub>3</sub>-*b*-PEG<sub>7</sub>-*b*-PLGA<sub>3</sub> micelles as a function of the PEG block length.

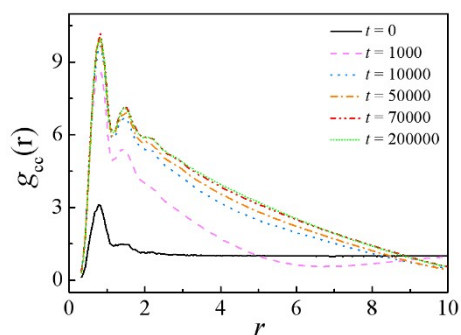

Fig. S5 The radial distribution functions between beads of the Dtx-loaded PLGA<sub>3</sub>-*b*-PEG<sub>7</sub>-*b*-PLGA<sub>3</sub> micelles at different simulation times.

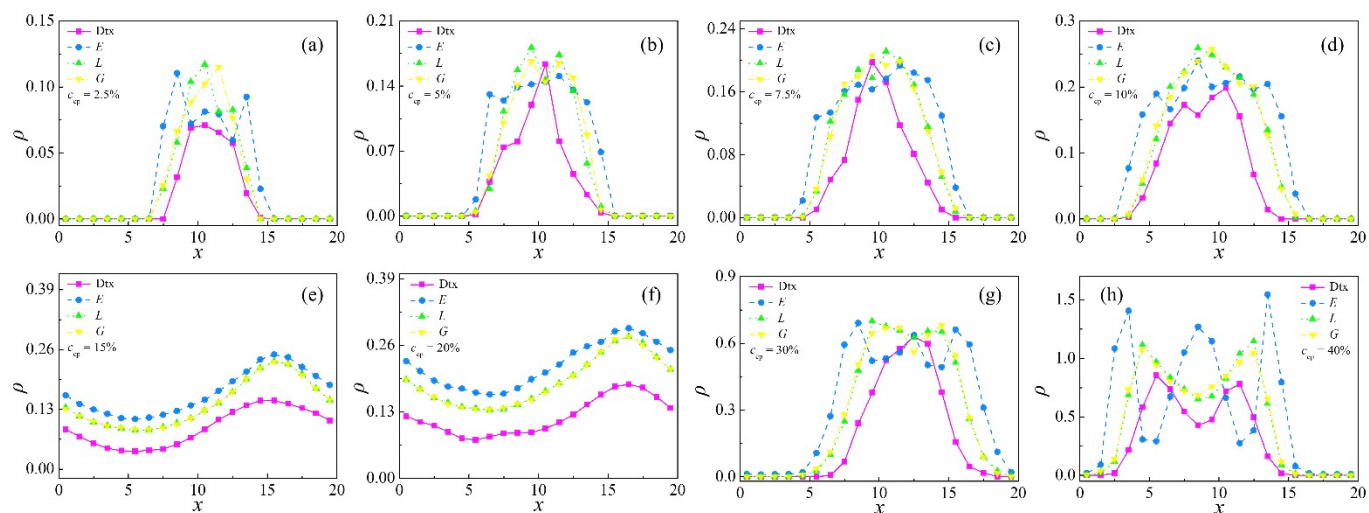

Fig. S6 Density profiles of E, L and G beads of the PLGA<sub>3</sub>-b-PEG<sub>7</sub>-b-PLGA<sub>3</sub> copolymers and Dtx beads as a function of copolymer concentration.

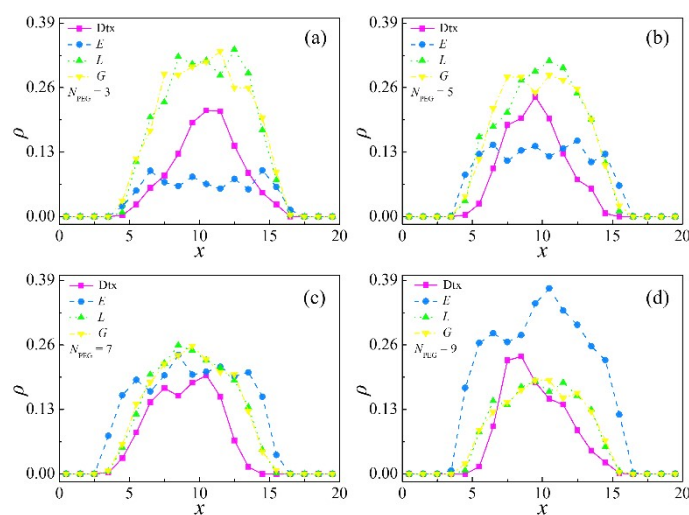

Fig. S7 Density profiles of E, L and G beads of the PLGA<sub>3</sub>-b-PEG<sub>7</sub>-b-PLGA<sub>3</sub> copolymers and Dtx beads as a function of the PEG block length.

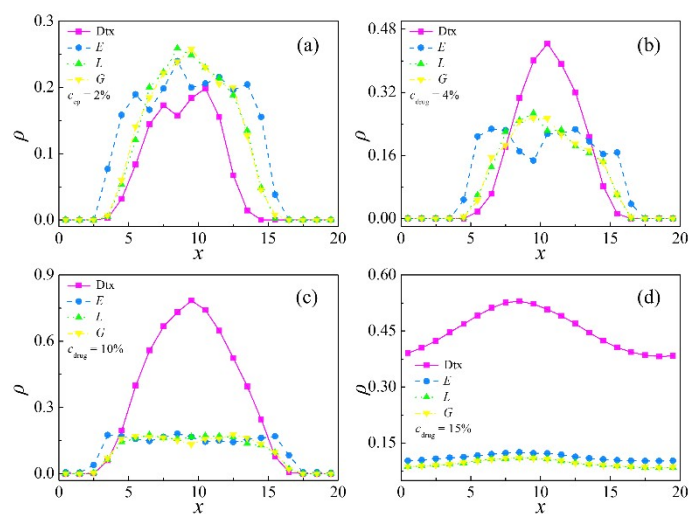

Fig. S8 Density profiles of E, L and G beads of the PLGA<sub>3</sub>-b-PEG<sub>7</sub>-b-PLGA<sub>3</sub> copolymers and Dtx beads as a function of the Dtx drug concentration.

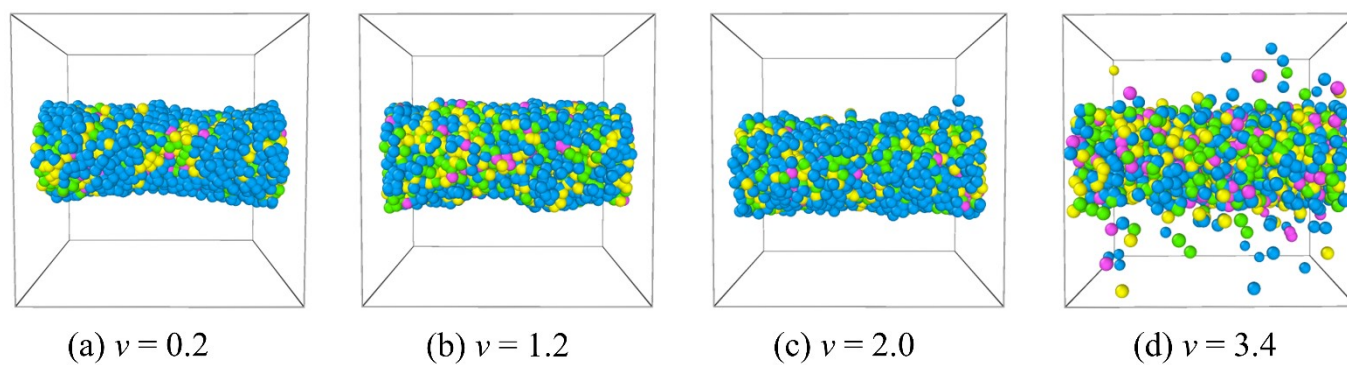

**Fig. S9** Morphologies snapshots of Dtx-loaded PLGA<sub>3</sub>-*b*-PEG<sub>7</sub>-*b*-PLGA<sub>3</sub> micelles under different shear rates  $v$  ( $v = 0.2, 1.2, 2.0, 3.4$ ).
